# Supplementary material
Source: publisher site journal article supplement (https://www.dovepress.com/article/221025)
Supplement: Supplementary file 1 [file get_supplementary_file.php]

**SUPPLEMENTARY DATA**


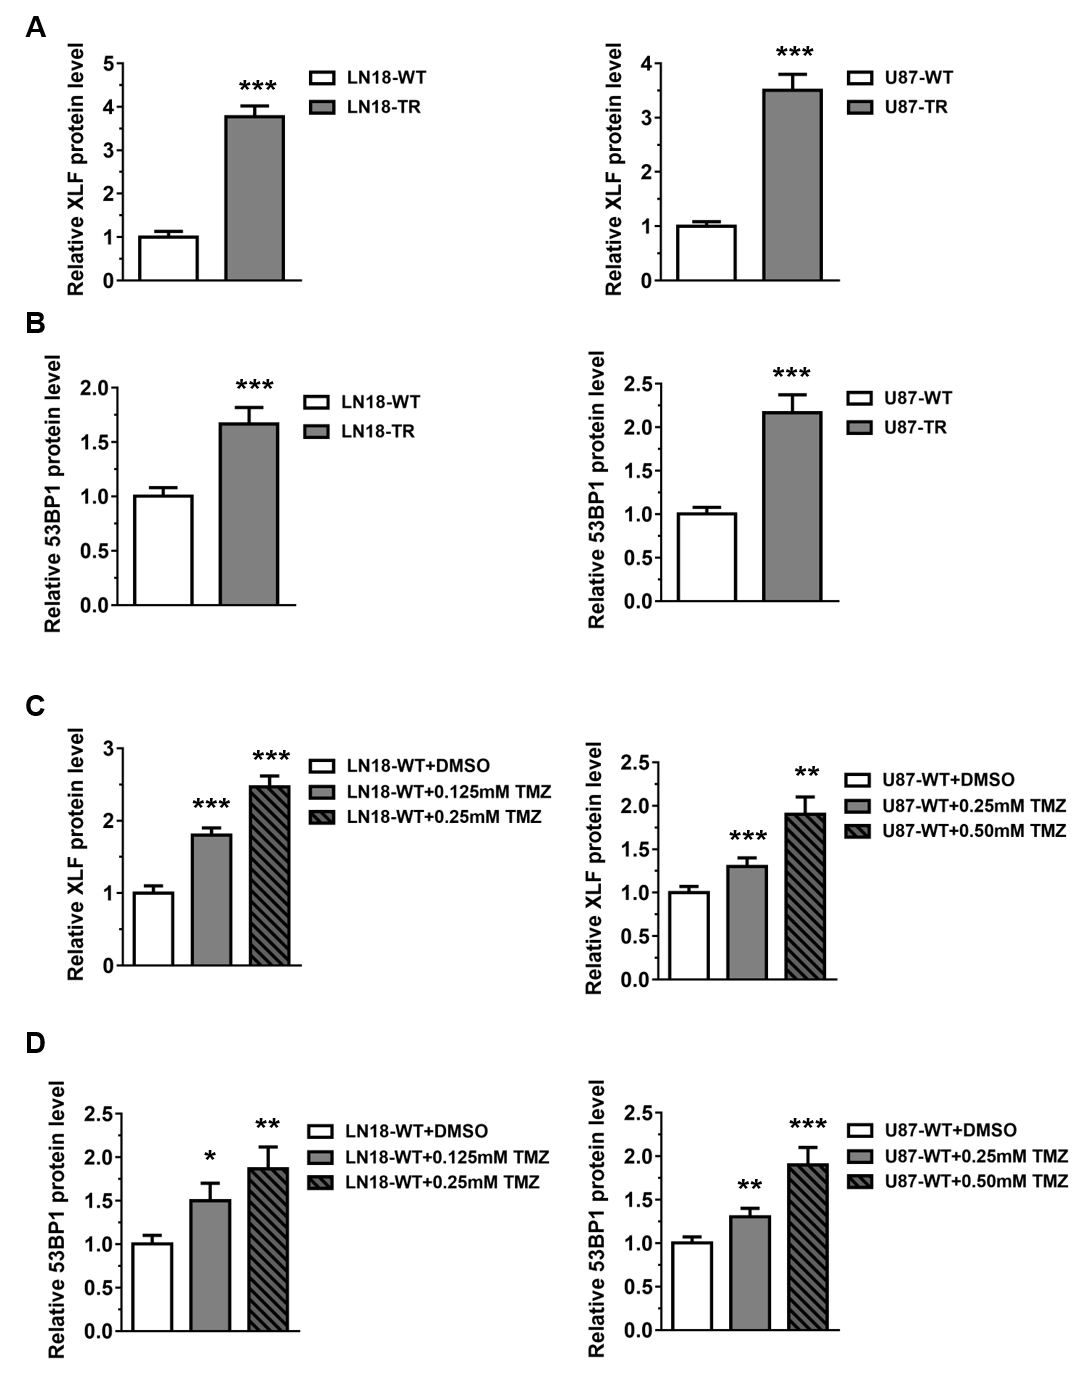


**Supplementary Figure 1 Quantification of XLF and 53BP1 expression in Figure 2.**

**A** Quantification ofXLF and **B** 53BP1in WT and TMZ-resistant GBM cells in Figure 2A and B. **C** Quantification ofXLF and **D** 53BP1in WT GBM cells treated with TMZ in Figure 2C and D.Results represent the means ± SD of three independent experiments. *P<0.05, **P<0.01, ***P<0.001.


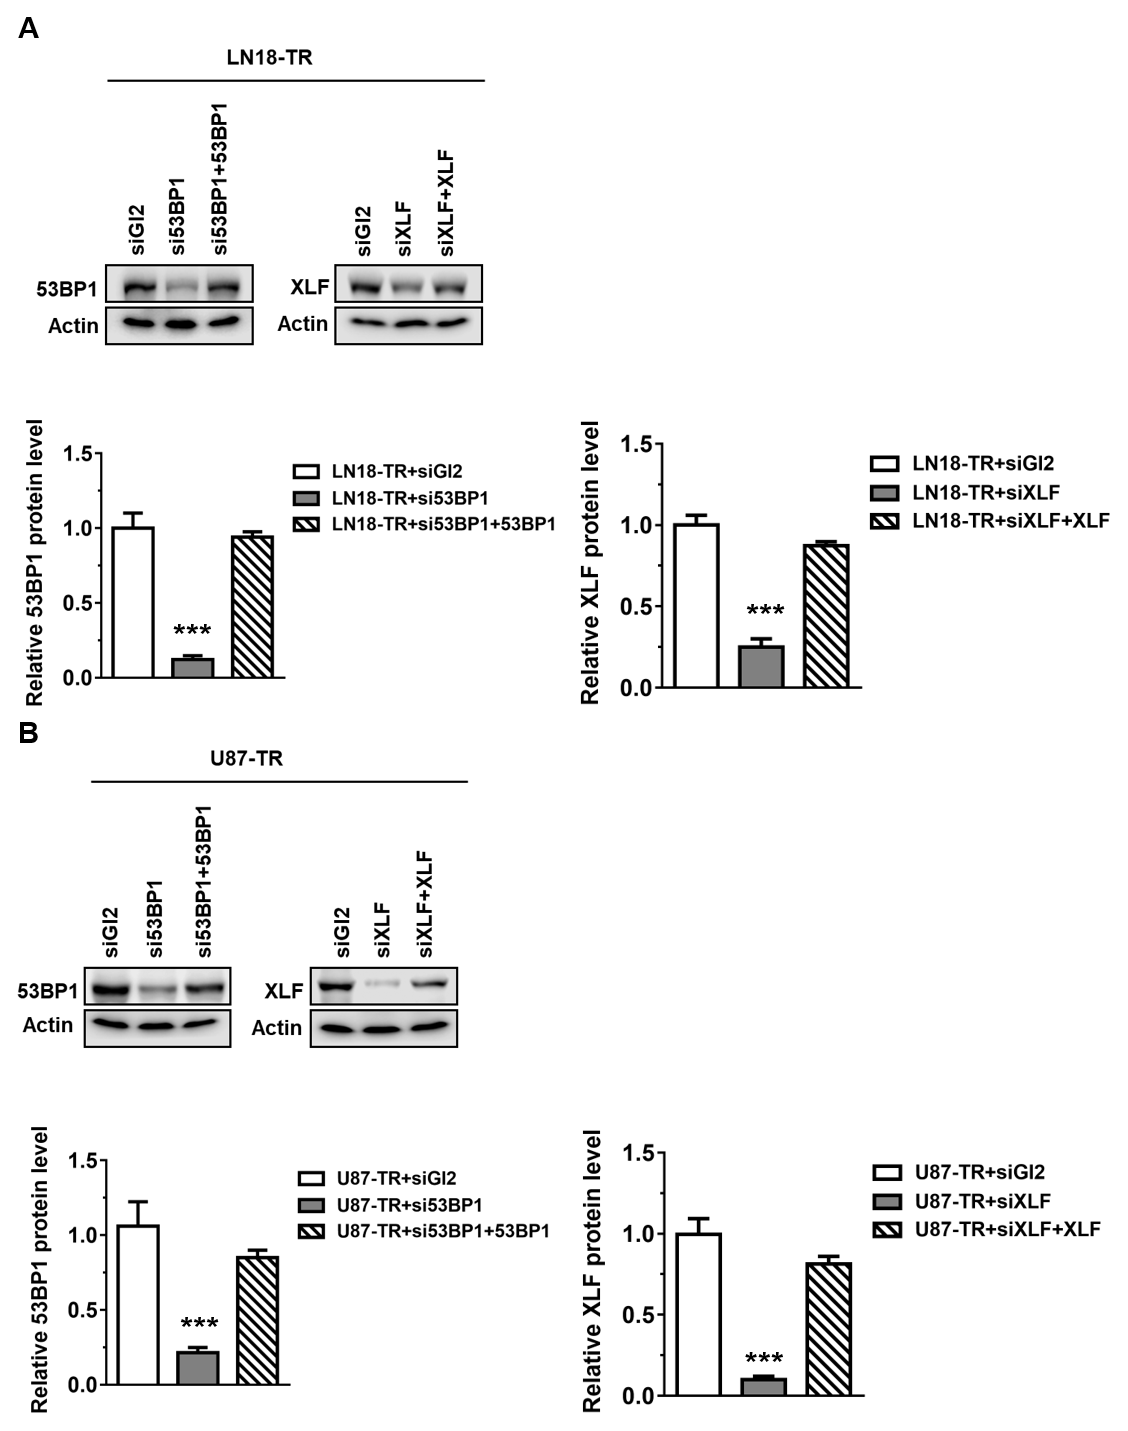


**Supplementary Figure 2 Ectopic expression of 53BP1 and XLF.**

**A** 53BP1 and XLF expression in LN18-TR+siGL2, LN18-TR+si53BP1, LN18-TR+siXLF, LN18-TR+si53BP1 with 53BP1 ectopic expressed and LN18-TR+siXLF with XLF ectopic expressed cell lines. Western blots (upper panel). Quantification of western blots (lower panel) Results represent the means ± SD of three independent experiments. ***P<0.001.

**B** 53BP1 and XLF expression in U87-TR+siGL2, U87-TR+si53BP1, U87-TR+siXLF, U87-TR+si53BP1 with 53BP1 ectopic expressed and U87-TR+siXLF with XLF ectopic expressed cell lines. Western blots (upper panel). Quantification of western blots (lower panel) Results represent the means ± SD of three independent experiments. ***P<0.001.


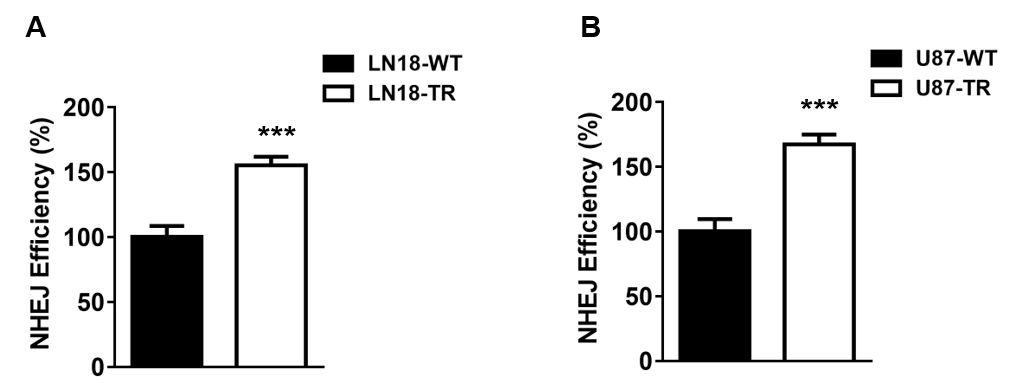


**Supplementary Figure 3 NHEJ is upregulated in TMZ resistant GBM cells.**

**A** Quantification of NHEJ events in LN18-WT and LN18-TR cells.Results represent the means ± SD of three independent experiments. ***P<0.001. **B** Quantification of NHEJ events in LN18-WT and LN18-TR cells.Results represent the means ± SD of three independent experiments. ***P<0.001.


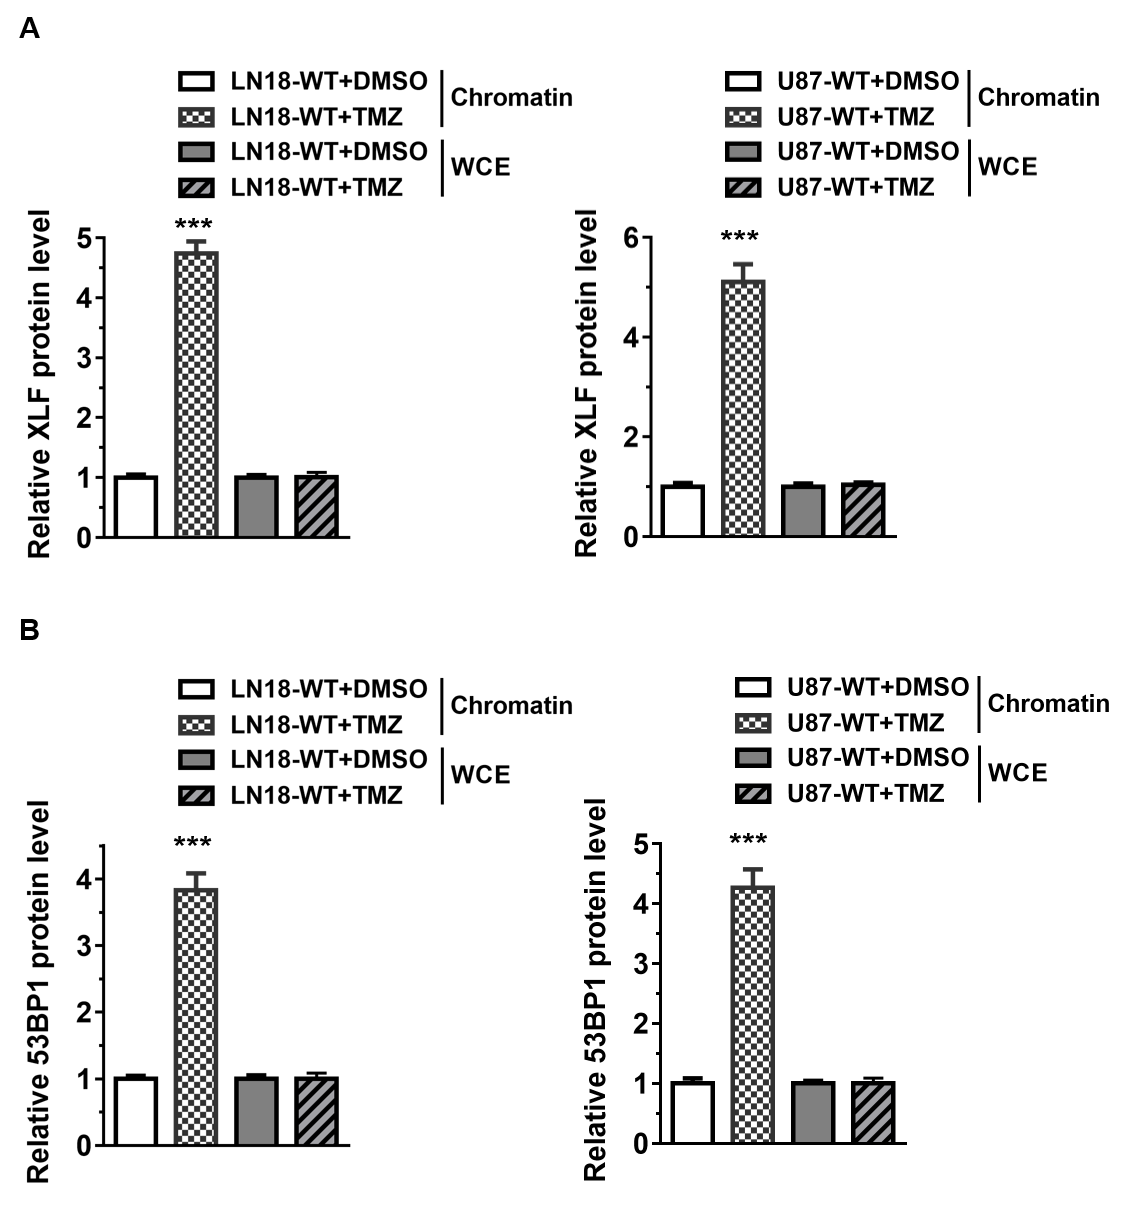


**Supplementary Figure 4 Quantification of XLF and 53BP1 expression in Figure 4.**

**A** Quantification ofXLF and **B** 53BP1in WT GBM cells treated with TMZ in Figure 4A and B.Results represent the means ± SD of three independent experiments. ***P<0.001.


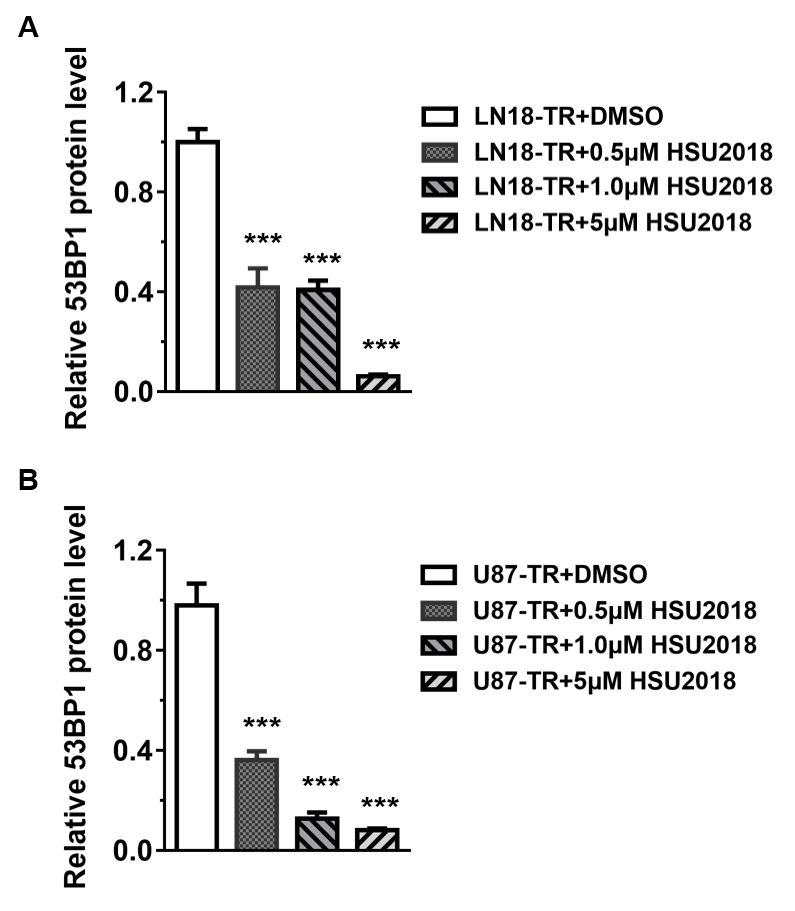


**Supplementary Figure 5 Quantification 53BP1 expression in Figure 5.**

**A** Quantification of53BP1in LN18-TR and **B** U87-TR cells treated with HSU2018 in Figure 5B and C.Results represent the means ± SD of three independent experiments. ***P<0.001.
